# Supplementary material
Source: PubMed Central journal article supplement (PMC8317952)
Supplement: NIHMS1665193-supplement-Supp_File.pdf [file NIHMS1665193-supplement-Supp_File.pdf]

## SUPPORTING INFORMATION

### Methylene Oxidation of Alkyl Sulfates by Cytochrome P450<sub>BM-3</sub> and a Role for Conformational Selection in Substrate Recognition

F. Peter Guengerich<sup>1,\*</sup> and Mostafa I. Fekry<sup>1,2</sup>

<sup>1</sup> Department of Biochemistry, Vanderbilt University School of Medicine, Nashville, Tennessee 37232-0146 U.S.A. and <sup>2</sup> Department of Pharmacognosy, Faculty of Pharmacy, Cairo University, 11562 Cairo, Egypt

[\\*f.guengerich@vanderbilt.edu](mailto:f.guengerich@vanderbilt.edu) (corresponding author)

#### TABLE OF CONTENTS

|                              |                                                                                                                                              |
|------------------------------|----------------------------------------------------------------------------------------------------------------------------------------------|
| <b>Supporting Figure S1.</b> | UV-visible spectra and second derivative spectra of P450 <sub>BM-3</sub> without and with tetradecyl sulfate.                                |
| <b>Supporting Figure S2.</b> | Identification of lauric acid oxidation products formed by P450 <sub>BM-3</sub> by GC-MS.                                                    |
| <b>Supporting Figure S3.</b> | LC-HRMS of P450 <sub>BM-3</sub> reaction products of dodecyl sulfate following Baeyer-Villiger derivatization to esters.                     |
| <b>Supporting Figure S4.</b> | LC-HRMS of P450 <sub>BM-3</sub> reaction products of dodecyl sulfate following Baeyer-Villiger derivatization to esters and base hydrolysis. |
| <b>Supporting Figure S5.</b> | Purity of P450 <sub>BM-3</sub> preparation determined using SDS-polyacrylamide gel electrophoresis.                                          |
| <b>Supporting Figure S6.</b> | Fe <sup>2+</sup> ·CO complex vs. Fe <sup>2+</sup> difference spectrum of P450 <sub>BM-3</sub> preparation (1.25 μM) used for this study.     |

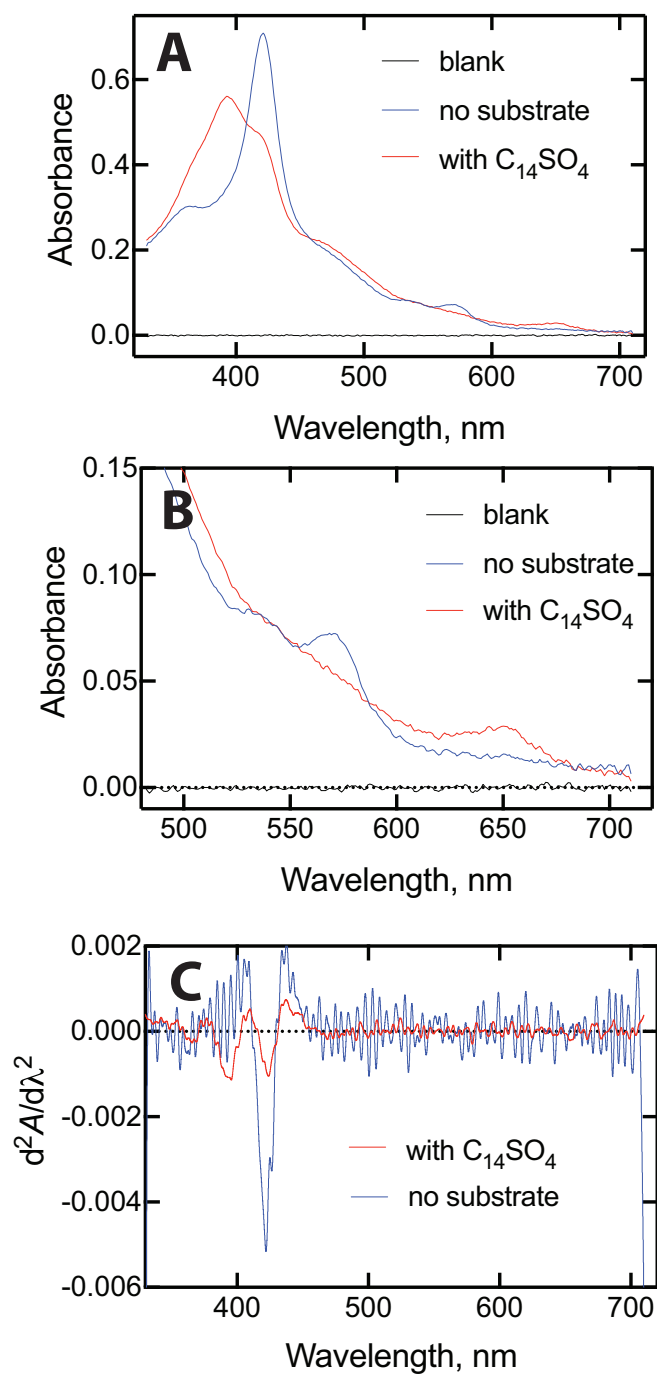

**Supporting Figure S1.** UV-visible spectra and second derivative spectra of P450<sub>BM-3</sub> without and with tetradecyl sulfate (C<sub>14</sub>SO<sub>4</sub>). All spectra were recorded with 5 μM P450<sub>BM-3</sub> in 50 mM potassium MOPS buffer (pH 7.4). **A.** Without (blue line) or with (red line) 50 μM tetradecyl sulfate (C<sub>14</sub>SO<sub>4</sub>). **B.** Part A expanded in the visible region. **C.** Second derivative spectra<sup>1</sup> of Part A (without substrate, blue line, filter 5 used for smoothing; with tetradecyl sulfate, red line, filter 19 used for smoothing).

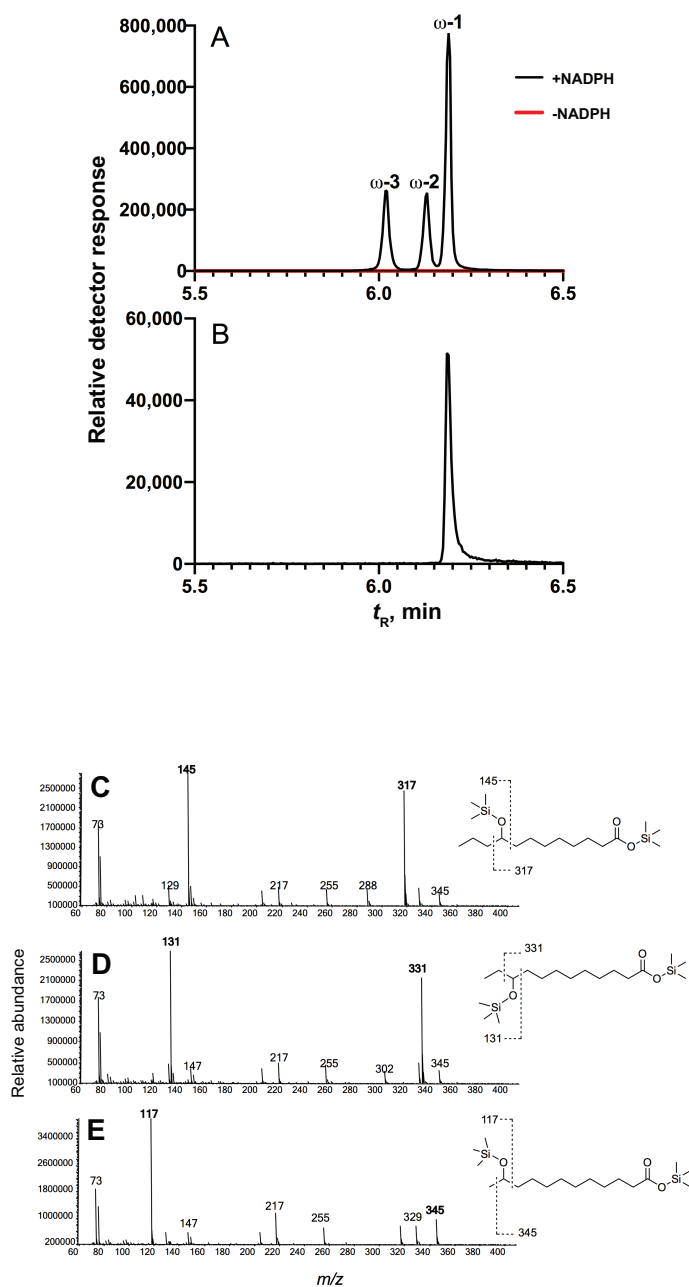

**Supporting Figure S2.** Identification of lauric acid oxidation products formed by P450<sub>BM-3</sub> by GC-MS. **A.** Ion chromatogram resulting from incubation of lauric acid with P450<sub>BM-3</sub> and NADPH, following derivatization to trimethylsilyl products. The GC-MS traces (*m/z* 345, *vide infra*) are shown for the reaction in the presence (black trace) and absence (red trace) of NADPH. **B.** Ion chromatogram for authentic standard 11-hydroxy lauric acid, following derivatization to trimethylsilyl derivative. **C-E.** mass fragmentation spectra of reaction products (from Part A). **C,**  $\omega$ -3 product; **D,**  $\omega$ -2 product; **E,**  $\omega$ -1 product.

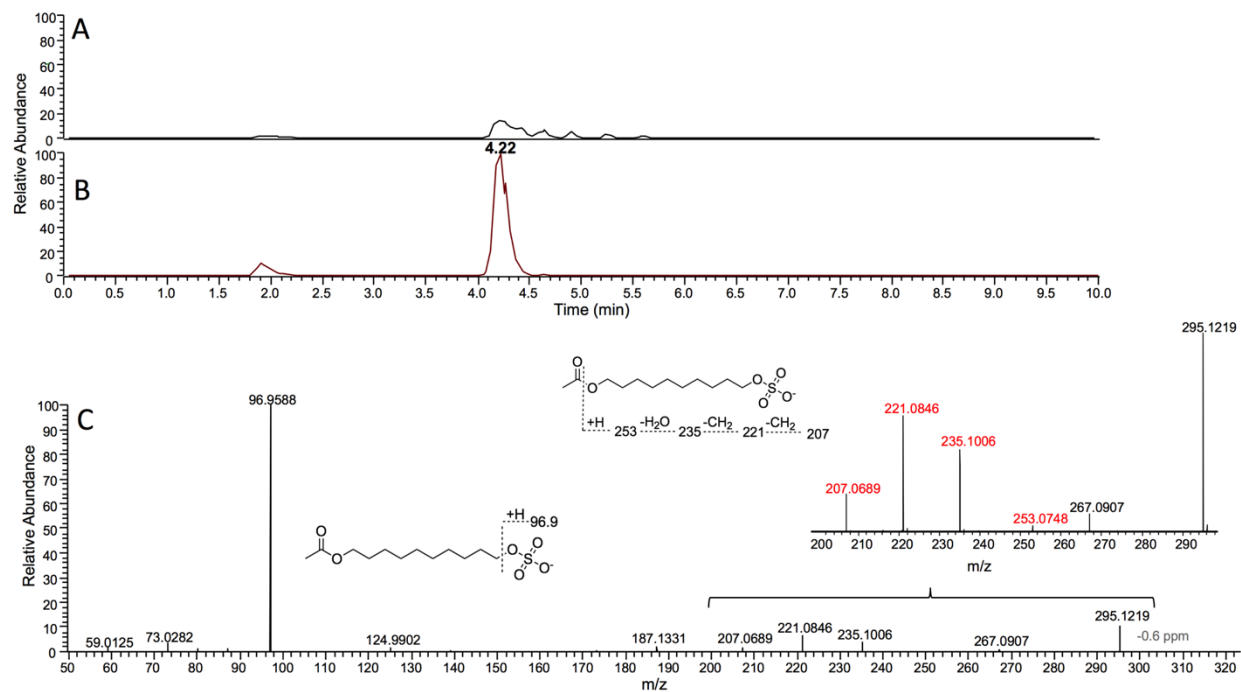

**Supporting Figure S3.** LC-HRMS of P450<sub>BM-3</sub> reaction products of dodecyl sulfate following Baeyer-Villiger derivatization to esters. **A.** Dodecyl sulfate incubated with NADPH but without P450<sub>BM-3</sub> for 2 minutes. **B.** Dodecyl sulfate incubated with NADPH and P450<sub>BM-3</sub>. Both reactions were followed by oxidation of alcohol products using Jones reagent<sup>2</sup> and then Baeyer-Villiger ketone oxidation<sup>3</sup> to form esters (Scheme 2). Extracted ion chromatograms for *m/z* 295.1221 are shown in Parts A and B, corresponding to product ester derivatives. **C.** HRMS (ESI) mass fragmentation spectrum of the ester formed from incubation of dodecyl sulfate with P450<sub>BM-3</sub> and NADPH followed by the chemical oxidation steps.

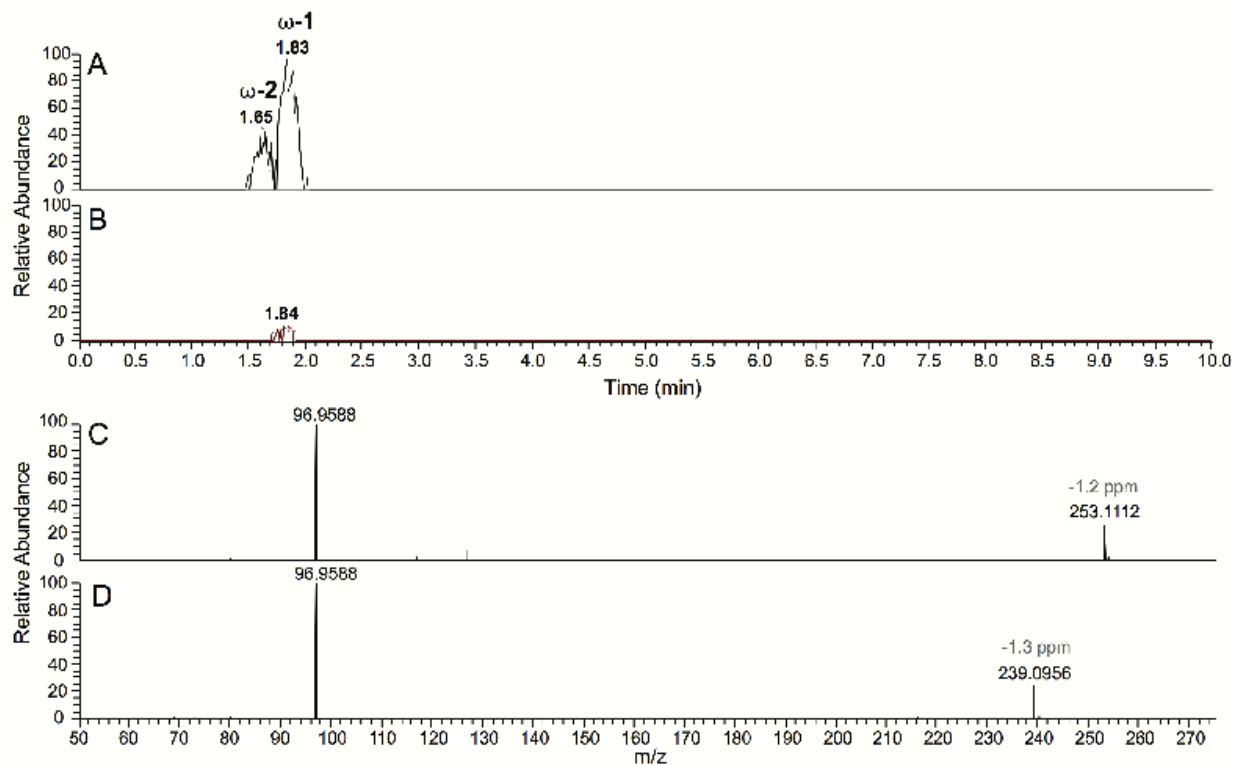

**Supporting Figure S4.** LC-HRMS of P450<sub>BM-3</sub> reaction products of dodecyl sulfate following Baeyer-Villiger derivatization to esters and base hydrolysis. **A.** Dodecyl sulfate incubated with NADPH and P450<sub>BM-3</sub> for 2 minutes. **B.** Dodecyl sulfate incubated with P450<sub>BM-3</sub> in the absence of NADPH. Both reactions were followed by oxidation of alcohol products using Jones reagent,<sup>2</sup> Baeyer-Villiger ketone oxidation<sup>3</sup> to form esters, and then NaOH treatment (Scheme 2). Extracted ion chromatograms for *m/z* 253.1115 and 239.0959 (combined) are shown in both Parts A and B, corresponding to the alcohol products detected after base hydrolysis. **C, D.** HRMS (ESI) mass fragmentation spectra of the alcohols formed from incubation of tetradecyl sulfate with P450<sub>BM-3</sub> and NADPH followed by the two chemical oxidation steps and base hydrolysis: **C,** fragmentation spectrum of the peak eluted at *t<sub>R</sub>* 1.83 min peak; **D,** fragmentation spectrum of the peak eluted at *t<sub>R</sub>* 1.65 min peak..

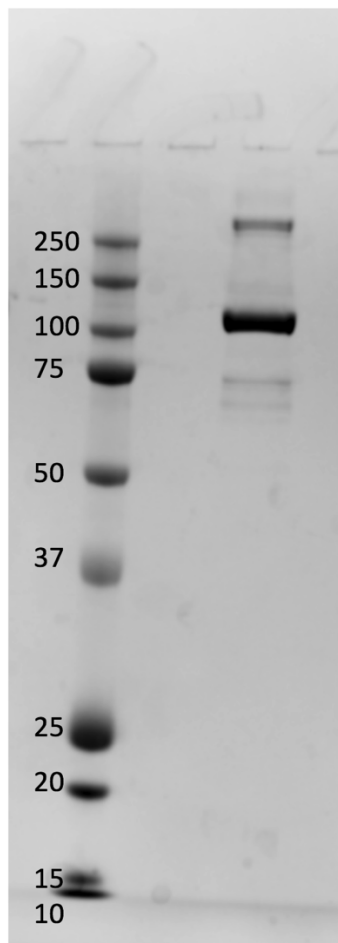

**Supporting Figure S5.** Purity of P450<sub>BM-3</sub> preparation determined using SDS-polyacrylamide gel electrophoresis (7.5%, w/v). The molecular weight standard markers (labeled as kDa) are on the left and the P450<sub>BM-3</sub> sample (10 pmol) is in the right lane. The higher band in the P450<sub>BM-3</sub> sample (~ 260 kDa) is presumed to be a dimer of the enzyme.

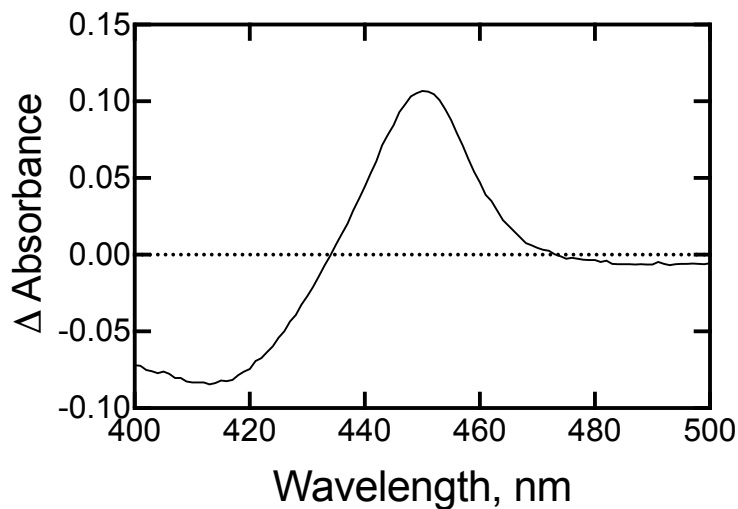

**Supporting Figure S6.**  $\text{Fe}^{2+}$ -CO complex vs.  $\text{Fe}^{2+}$  difference spectrum of P450<sub>BM-3</sub> preparation (1.25  $\mu\text{M}$ ) used for this study.

#### References

1. O'Haver, T. C.; Green, G. L., Numerical Error Analysis of Derivative Spectrometry for the Quantitative Analysis of Mixtures, *Anal. Chem.* **1976**, *48*, 312-318.
2. Bowden, K.; Heilbron, I. M.; Jones, E. R. H.; Weedon, B. C. L., 13. Researches on Acetylenic compounds. Part I. The Preparation of Acetylenic Ketones by Oxidation of Acetylenic Carbinols and Glycols, *J. Chem. Soc.* **1946**, 39-45.
3. Olah, G. A.; Wang, Q.; Trivedi, N. J.; Prakash, G. K. S., Baeyer-Villiger Oxidation of Ketones to Esters with Sodium Percarbonate/Trifluoroacetic Acid, *Synthesis-Stuttgart* **1991**, 739-740.
